# Supplementary material
Source: ML conference proceedings conference paper supplement (https://openaccess.thecvf.com/content/ICCV_2019/html/Li_Topological_Map_Extraction_ICCV_2019_paper.html)
Supplement: Supplementary file 1 [file Li_Topological_Map_Extraction_ICCV_2019_supplemental.pdf]

# Topological Map Extraction From Overhead Images

## Supplementary Material

### A. Self-collected Dataset

As mentioned in the main paper, we collected our own dataset that contains annotations of building footprints and road networks. This dataset was created by following the same procedure used to obtain the datasets of crowdAI [6] and RoadTracer [1]. The overhead images are from Google Maps and the annotations are from OpenStreetMap [2]. To obtain the satellite imagery from Google Maps, an API key from the link is required. For OpenStreetMap, there is no such limitation.

For building annotations, we do not distinguish between different types of buildings but discard those that are not visible (this information is provided by OpenStreetMap). In terms of roads, very small roads such as pedestrian and sidewalk, as well as invisible roads are ignored (the same procedure was adopted for RoadTracer [1]).

The detailed statistics of our PolyMapper dataset are presented in Tab. 1.

Table 1: Statistics of PolyMapper dataset

| City                    | Boston   | Chicago   | Sunnyvale |
|-------------------------|----------|-----------|-----------|
| Min Latitude            | 42.3085  | 41.7500   | 37.3419   |
| Max Latitude            | 42.4335  | 41.9800   | 37.4210   |
| Min Longitude           | -71.1840 | -87.7300  | -122.1269 |
| Max Longitude           | -71.0000 | -87.5600  | -121.9370 |
| #Images                 | 150,768  | 151,776   | 104,544   |
| Area (km <sup>2</sup> ) | 172.804  | 173.959   | 119.824   |
| #Buildings              | 872,932  | 1,530,192 | 659,262   |
| Road Length (km)        | 3003.66  | 3908.67   | 1992.96   |

### B. Detailed Quantitative Results

In the main paper, we compare PolyMapper with state-of-the-arts (Mask R-CNN [3] and PANet [4] for buildings, DeepRoadMapper [5] and RoadTracer [1] for roads) on our own collected dataset. We report a weighted average among the three cities Boston, Chicago and Sunnyvale. Here the detailed experiment results on each city of the PolyMapper dataset can be seen in Tab. 2 (buildings) and Tab. 3 (roads). Results show that PolyMapper is able to outperform or be on par with state-of-the-art methods.

### C. Zoomed-in Qualitative Results

In the main paper, we showed topological maps predicted by PolyMapper on some selected areas of the three cities in the dataset. Here we further provide zoomed-in maps on several selected local areas in Fig. 1 (Boston), Fig. 2 (Chicago) and Fig. 3 (Sunnyvale).

We can see that in Fig. 1a, PolyMapper can even deal with buildings with round shapes (which are approximated using polygons). Fig. 1b and Fig. 1c show the predicted topological maps on areas whose road networks are quite complicated and are not vertically or horizontally aligned. The road networks in Fig. 2 present a shape of chess-board and the buildings are mostly rectangular. Fig. 3 further shows the superiority of PolyMapper in building footprints segmentation. Compared to the output of pixel-level segmentation models, the building footprints predicted by PolyMapper have sharp corners and exhibit more compact representations.

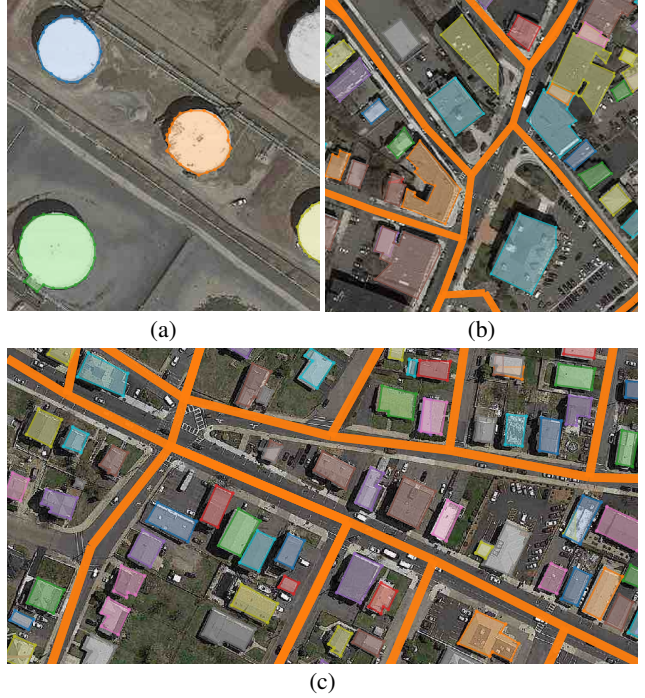

Figure 1: Sample areas of Boston

Table 2: Evaluation on the PolyMapper dataset for each city: Buildings

| <b>Boston</b>    | AP          | AP <sub>50</sub> | AP <sub>75</sub> | AP <sub>S</sub> | AP <sub>M</sub> | AP <sub>L</sub> | AR          | AR <sub>50</sub> | AR <sub>75</sub> | AR <sub>S</sub> | AR <sub>M</sub> | AR <sub>L</sub> |
|------------------|-------------|------------------|------------------|-----------------|-----------------|-----------------|-------------|------------------|------------------|-----------------|-----------------|-----------------|
| Mask R-CNN       | 23.8        | 57.0             | <b>14.0</b>      | 7.6             | 32.4            | 44.1            | 30.5        | 59.8             | <b>27.5</b>      | 8.1             | 41.8            | 55.5            |
| PANet            | <b>24.1</b> | 57.2             | 13.9             | 7.1             | <b>33.2</b>     | <b>48.4</b>     | 30.5        | 59.7             | 27.4             | 7.2             | <b>42.2</b>     | <b>57.9</b>     |
| Ours             | 23.3        | <b>61.8</b>      | 11.0             | <b>12.2</b>     | 29.1            | 38.6            | <b>33.0</b> | <b>69.5</b>      | 26.8             | <b>16.8</b>     | 40.8            | 57.8            |
| <b>Chicago</b>   | AP          | AP <sub>50</sub> | AP <sub>75</sub> | AP <sub>S</sub> | AP <sub>M</sub> | AP <sub>L</sub> | AR          | AR <sub>50</sub> | AR <sub>75</sub> | AR <sub>S</sub> | AR <sub>M</sub> | AR <sub>L</sub> |
| Mask R-CNN       | 46.5        | 74.5             | 54.3             | 30.5            | 61.5            | <b>54.0</b>     | 51.1        | 75.6             | 60.8             | 35.6            | 67.0            | <b>62.6</b>     |
| PANet            | 46.2        | 75.6             | 53.5             | 32.0            | 59.6            | 50.6            | 51.3        | 76.2             | 61.0             | 37.7            | 65.4            | 57.2            |
| Ours             | <b>51.2</b> | <b>87.0</b>      | <b>56.7</b>      | <b>40.1</b>     | <b>61.6</b>     | 42.1            | <b>58.0</b> | <b>89.1</b>      | <b>66.2</b>      | <b>47.6</b>     | <b>68.6</b>     | 61.0            |
| <b>Sunnyvale</b> | AP          | AP <sub>50</sub> | AP <sub>75</sub> | AP <sub>S</sub> | AP <sub>M</sub> | AP <sub>L</sub> | AR          | AR <sub>50</sub> | AR <sub>75</sub> | AR <sub>S</sub> | AR <sub>M</sub> | AR <sub>L</sub> |
| Mask R-CNN       | 42.9        | 66.8             | 50.3             | 10.7            | 53.6            | 32.5            | 48.0        | 68.8             | 56.8             | 12.6            | 59.2            | 56.2            |
| PANet            | 45.0        | 70.6             | <b>52.8</b>      | 13.0            | 56.1            | 28.5            | 50.6        | 72.8             | 59.6             | 15.1            | 62.0            | 54.1            |
| Ours             | <b>47.7</b> | <b>78.5</b>      | <b>52.8</b>      | <b>19.3</b>     | <b>56.9</b>     | <b>35.6</b>     | <b>56.2</b> | <b>83.4</b>      | <b>63.4</b>      | <b>28.3</b>     | <b>65.2</b>     | <b>60.3</b>     |

Table 3: Evaluation on the PolyMapper dataset for each city: Roads

| <b>Boston</b>    | SP <sub>±5%</sub> | SP <sub>±10%</sub> | AP <sub>85</sub> | AP <sub>90</sub> | AP <sub>95</sub> | AR <sub>85</sub> | AR <sub>90</sub> | AR <sub>95</sub> |
|------------------|-------------------|--------------------|------------------|------------------|------------------|------------------|------------------|------------------|
| DeepRoadMapper   | 24.8              | 40.7               | 60.7             | 41.4             | 23.5             | 61.6             | 44.1             | 25.6             |
| RoadTracer       | 52.6              | 70.6               | 72.5             | 64.2             | 45.1             | 82.5             | 72.7             | 53.6             |
| Ours             | <b>59.6</b>       | <b>80.0</b>        | <b>88.0</b>      | <b>81.2</b>      | <b>61.3</b>      | <b>87.8</b>      | <b>80.7</b>      | <b>59.1</b>      |
| <b>Chicago</b>   | SP <sub>±5%</sub> | SP <sub>±10%</sub> | AP <sub>85</sub> | AP <sub>90</sub> | AP <sub>95</sub> | AR <sub>85</sub> | AR <sub>90</sub> | AR <sub>95</sub> |
| DeepRoadMapper   | 80.0              | 86.1               | 87.1             | 83.8             | 77.0             | 90.0             | 86.9             | 80.4             |
| RoadTracer       | 70.5              | 75.9               | 92.0             | 87.2             | 76.1             | 80.7             | 76.2             | 70.6             |
| Ours             | <b>89.8</b>       | <b>95.5</b>        | <b>98.4</b>      | <b>96.0</b>      | <b>90.1</b>      | <b>98.5</b>      | <b>96.0</b>      | <b>88.5</b>      |
| <b>Sunnyvale</b> | SP <sub>±5%</sub> | SP <sub>±10%</sub> | AP <sub>85</sub> | AP <sub>90</sub> | AP <sub>95</sub> | AR <sub>85</sub> | AR <sub>90</sub> | AR <sub>95</sub> |
| DeepRoadMapper   | 40.9              | 57.9               | 75.1             | 60.1             | 42.8             | 76.0             | 60.7             | 42.1             |
| RoadTracer       | <b>74.0</b>       | <b>86.5</b>        | 84.0             | 74.7             | 59.3             | <b>93.2</b>      | <b>87.0</b>      | <b>74.5</b>      |
| Ours             | 69.1              | 80.3               | <b>90.8</b>      | <b>82.2</b>      | <b>69.8</b>      | 90.8             | 82.1             | 70.2             |

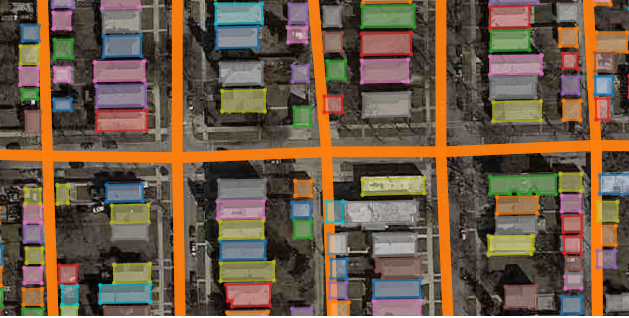

(a)

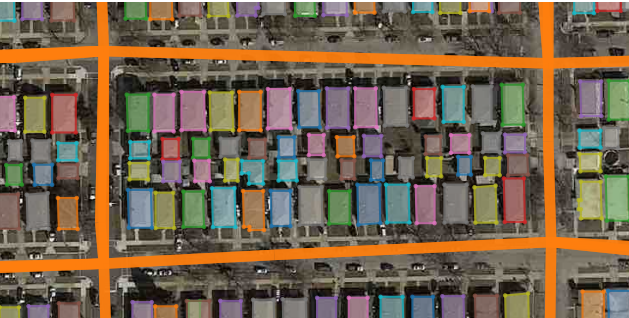

(b)

Figure 2: Sample areas of Chicago

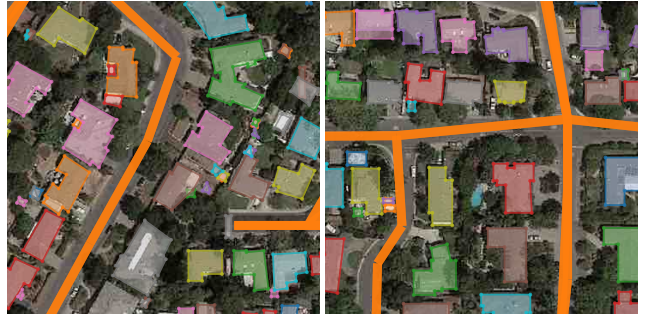

(a)

(b)

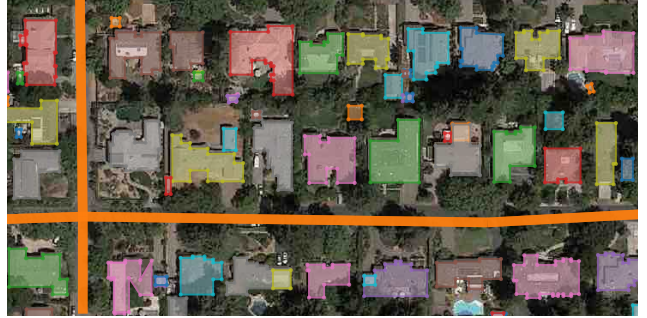

(c)

Figure 3: Sample areas of Sunnyvale

## References

- [1] Favyen Bastani, Songtao He, Mohammad Alizadeh, Hari Balakrishnan, Samuel Madden, Sanjay Chawla, Sofiane Abbar, and David DeWitt. RoadTracer: Automatic Extraction of Road Networks from Aerial Images. In *Computer Vision and Pattern Recognition (CVPR)*, Salt Lake City, UT, June 2018.
- [2] Mordechai Haklay and Patrick Weber. OpenStreetMap: User-Generated Street Maps. *IEEE Pervasive Computing*, 7(4):12–18, 2008.
- [3] Kaiming He, Georgia Gkioxari, Piotr Dollár, and Ross Girshick. Mask r-cnn. In *Computer Vision (ICCV), 2017 IEEE International Conference on*, pages 2980–2988. IEEE, 2017.
- [4] Shu Liu, Lu Qi, Haifang Qin, Jianping Shi, and Jiaya Jia. Path aggregation network for instance segmentation. In *Proceedings of IEEE Conference on Computer Vision and Pattern Recognition (CVPR)*, 2018.
- [5] Gellert Mátyus, Wenjie Luo, and Raquel Urtasun. Deep-roadmapper: Extracting road topology from aerial images. In *The IEEE International Conference on Computer Vision (ICCV)*, Oct 2017.
- [6] Sharada Prasanna Mohanty. Crowdai dataset. [https://www.crowdai.org/challenges/mapping-challenge/dataset\\_files](https://www.crowdai.org/challenges/mapping-challenge/dataset_files), 2018.
